# Supplementary material for: Demonstrating Tumor Vascular Disrupting Activity of the Small-Molecule Dihydronaphthalene Tubulin-Binding Agent OXi6196 as a Potential Therapeutic for Cancer Treatment
Source: MDPI journal article supplement (doi:10.3390/cancers14174208), 2022-08-30

*Supplementary Materials*

## **Demonstrating Tumor Vascular Disrupting Activity of the Small-Molecule Dihydronaphthalene Tubulin-Binding Agent OXi6196 as a Potential Therapeutic for Cancer Treatment**

Li Liu <sup>1,2</sup>, Regan Schuetze <sup>1</sup>, Jeni L. Gerberich <sup>1</sup>, Ramona Lopez <sup>1</sup>, Samuel O. Odutola <sup>3</sup>, Rajendra P. Tanpure <sup>3</sup>, Amanda K. Charlton-Sevcik <sup>3</sup>, Justin K. Tidmore <sup>3</sup>, Emily A.-S. Taylor <sup>3</sup>, Payal Kapur <sup>2,4</sup>, Hans Hammers <sup>2,5</sup>, Mary Lynn Trawick <sup>3,†</sup>, Kevin G. Pinney <sup>3,†</sup>, and Ralph P. Mason <sup>1,2,\*</sup>

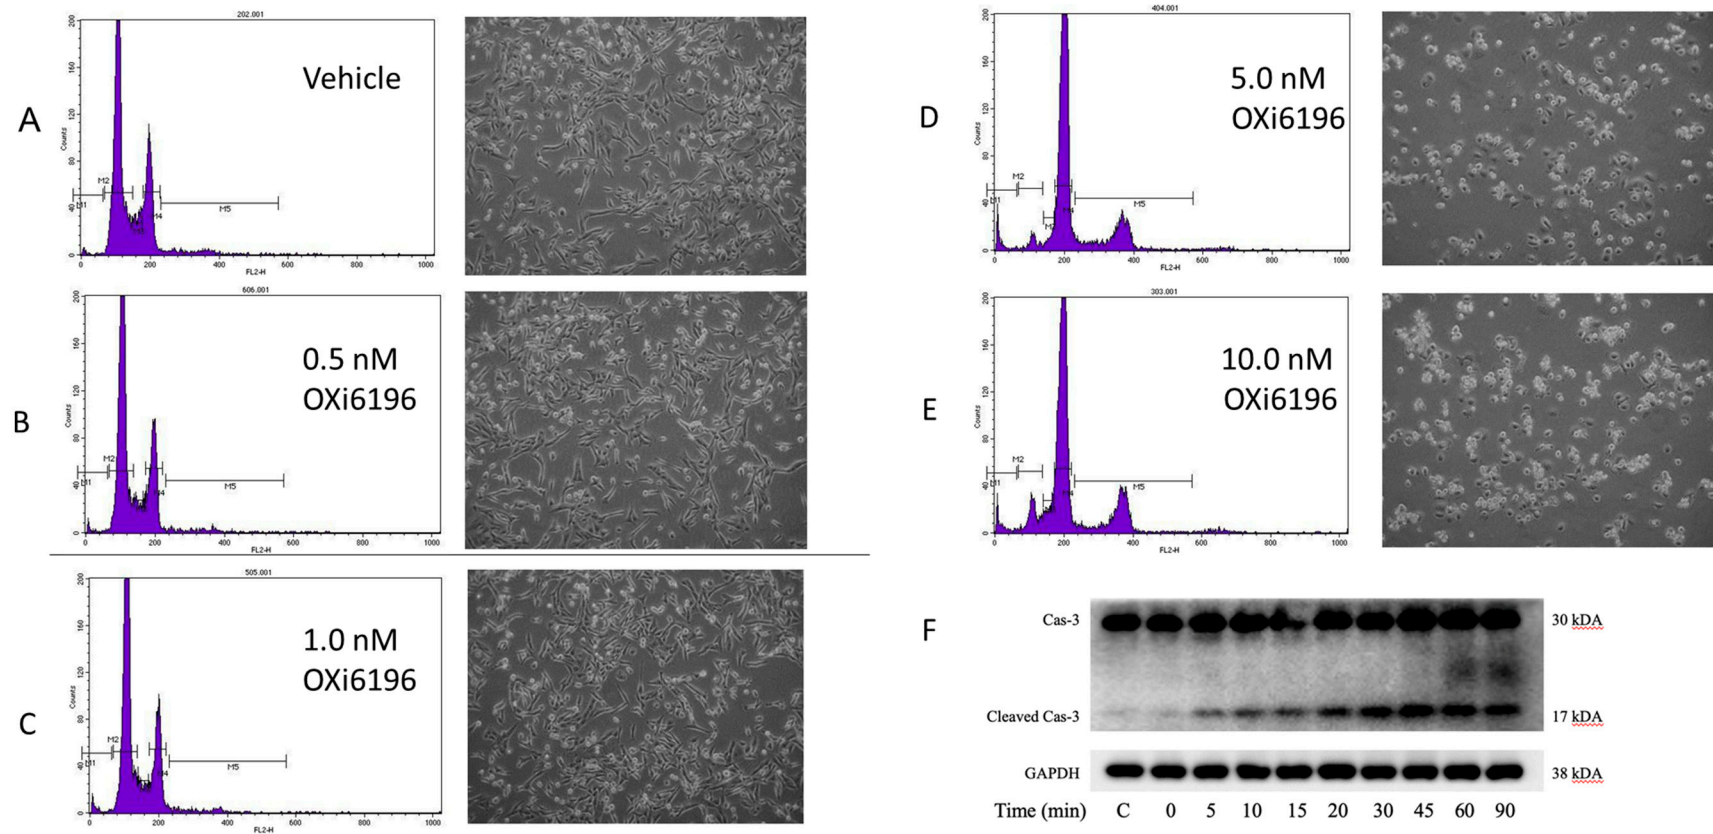

**Figure S1:** Flow cytometry of MDA-MB-231 cells treated with A) vehicle control, B) 0.5 nM, C) 1.0 nM, D) 5.0 nM, E) 10.0 nM OXi6196. For concentrations  $\geq 5$  nM G2/M blockade was observed and cells were round and lifting from substrate. F) Time-dependent cleavage of caspase-3 in MDA-MB-231 cells with 10 nM OXi6196 treatment.

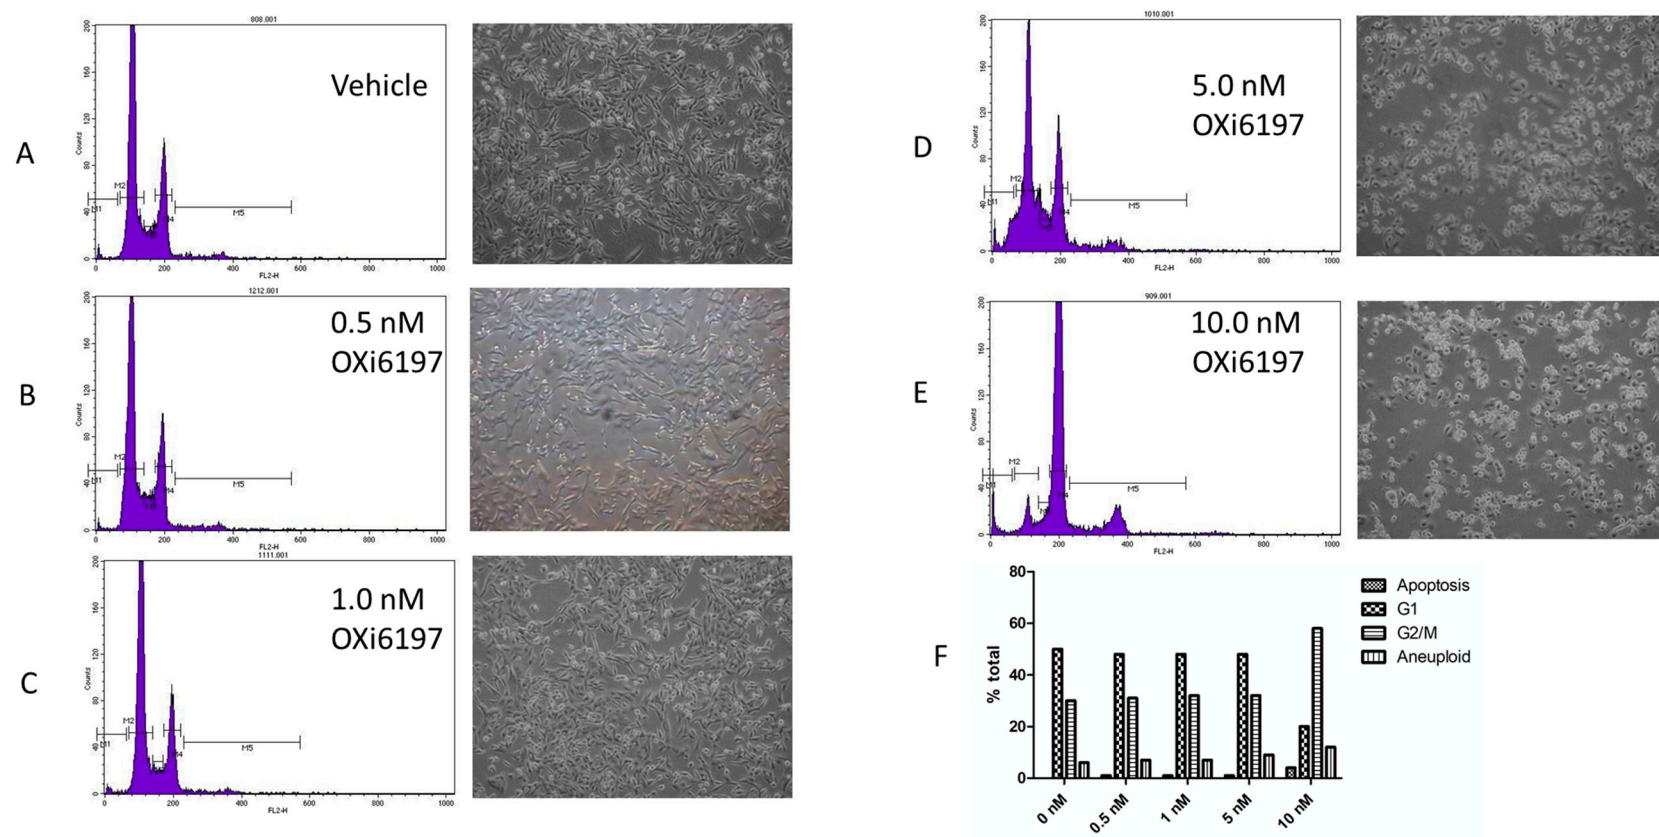

**Figure S2.** Flow cytometry of MDA-MB-231 cells treated with A) vehicle control, B) 0.5 nM, C) 1.0 nM, D) 5.0 nM, and E) 10.0 nM OXi6197. At 5 nM OXi6197 treatment (D) the cells were rounding, and at 10 nM (E) G2/M blockade was observed, as summarized in (F).

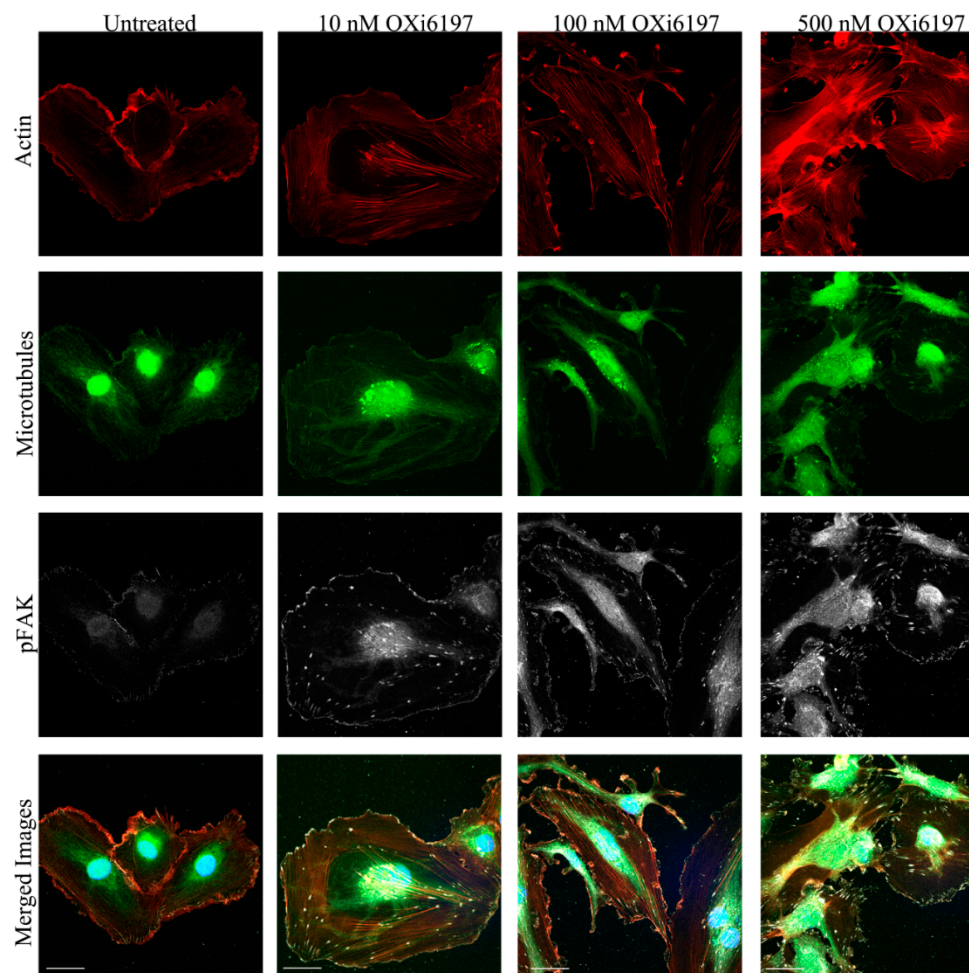

**Figure S3:** Effects of OXi6197 treatment on activated HUVECs: confocal microscopy. Representative confocal images demonstrating the concentration-dependent morphological effects of OXi6197 treatment on activated HUVECs. Monolayers of HUVECs growing on gelatin-coated coverslips were treated with vehicle, or 10 nM, 100 nM or 500 nM OXi6197 for 2 h. HUVECs were fixed and stained with Alexa Fluor™ 594-conjugated phalloidin (red, actin), anti- $\alpha$ -tubulin antibody (green, microtubules), and anti-pFAKY397(Cy5 white, pFAK). The concentration dependent increase in focal adhesion kinase phosphorylation demonstrates focal adhesion formation.

### Vehicle Control

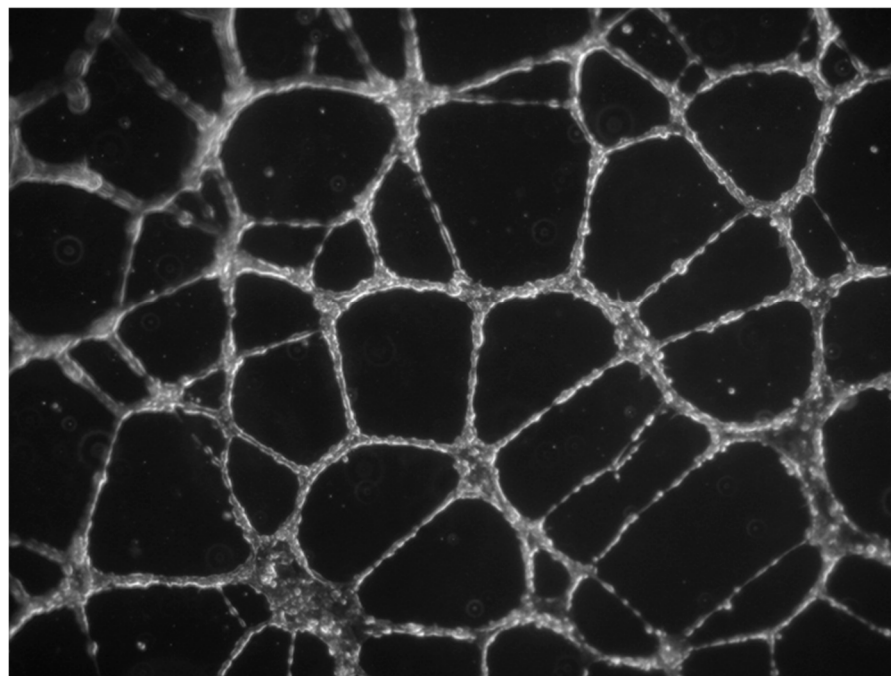

**Figure S4: HUVEC capillary-like network established on Matrigel®**

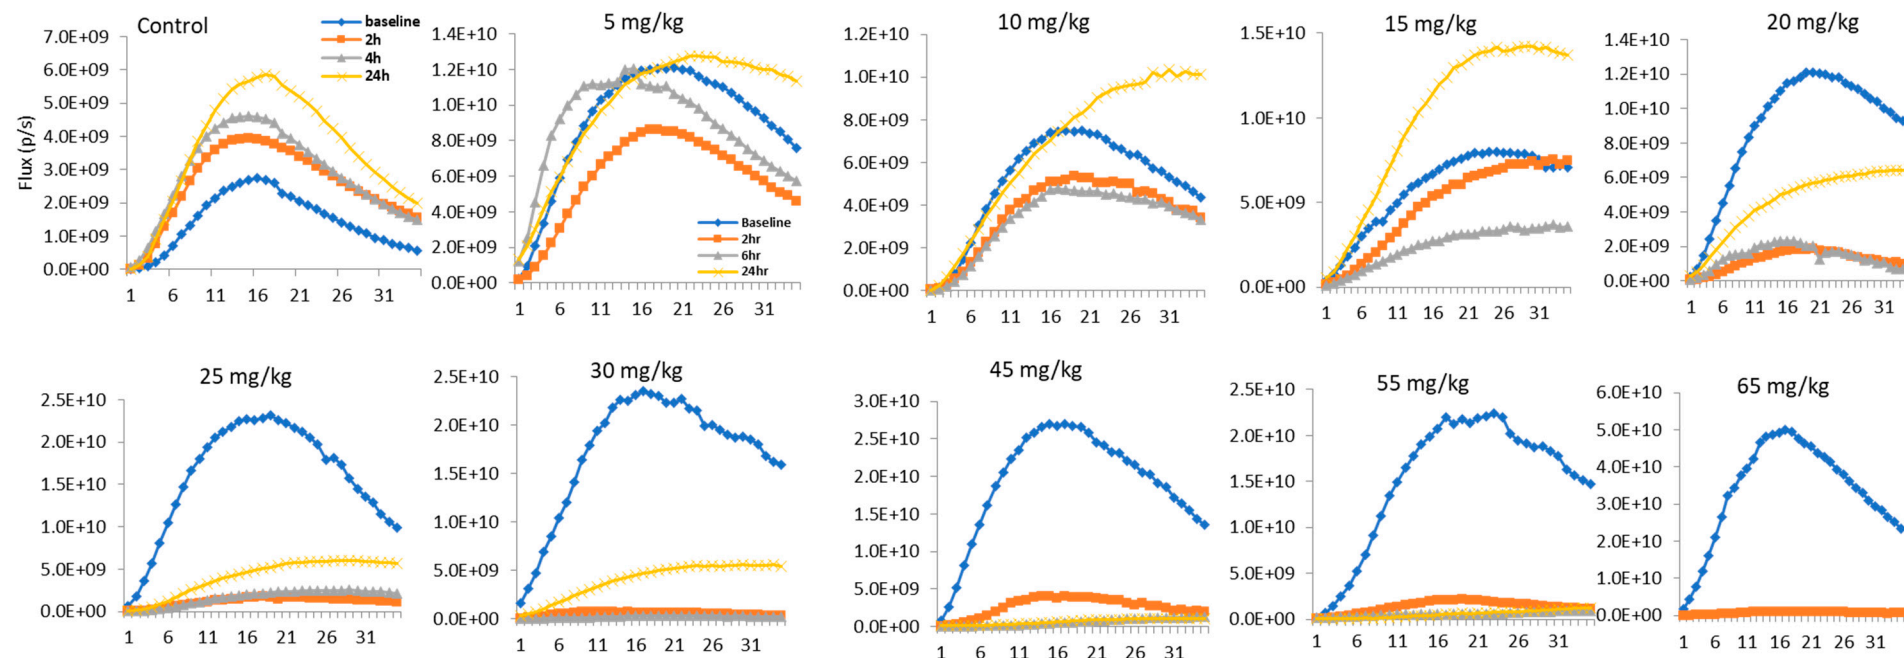

**Figure S5.** BLI observations of the MDA-MB-231-luc tumor dose response to OXi6197. BLI intensity curves for respective individual mice showed differential variations over a period of 35 mins following the administration of luciferin at baseline (blue), 2 h (orange), 4 or 6 h (grey) and 24 h (yellow) following each of the doses of OXi6197: respectively, saline control, 5 mg/kg, 10 mg/kg, 15 mg/kg, 20 mg/kg, 25 mg/kg, 30 mg/kg, 45 mg/kg 55 mg/kg and 65 mg/kg. Sequential time courses for the saline control indicated increased signal consistent with rapid tumor growth. Meanwhile, increasing doses of OXi6197 led to lower signal, as summarized in Supplementary Figure S6.

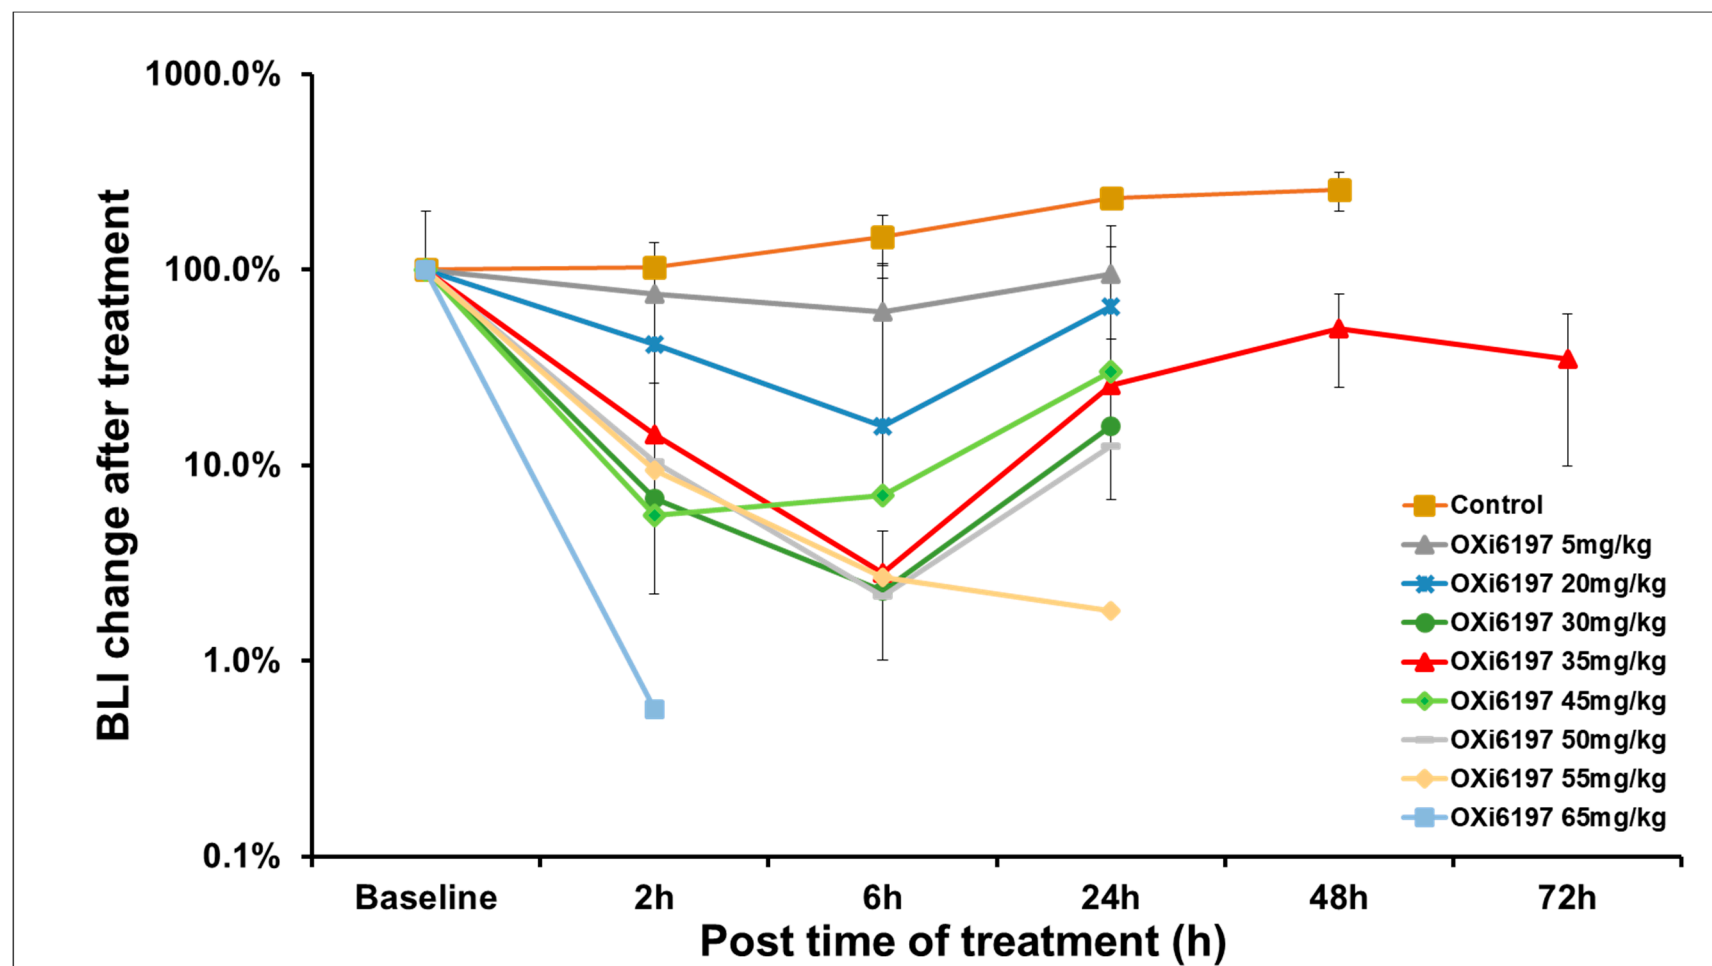

**Figure S6:** Comparison of relative vascular shutdown following increasing doses of OXi6197. Relative signals indicated differential dose responses following the administration of different doses of OXi6197 to MDA-MB-231-luc tumor-bearing NOD SCID mice: saline control (n = 5, brown square), 5 mg/kg (n = 2, grey triangle), 20 mg/kg (n = 4, blue cross), 30 mg/kg (n = 4, green circle), 35 mg/kg (n = 14, red triangle) and 45 mg/kg (n=3, green diamond), 50 mg/kg (n = 2, grey square), 55 mg/kg (n = 1, yellow triangle), and 65 mg/kg (n = 1, blue square). Individual data points are the mean  $\pm$  SD of maximum intensity observed on the light emission curve.

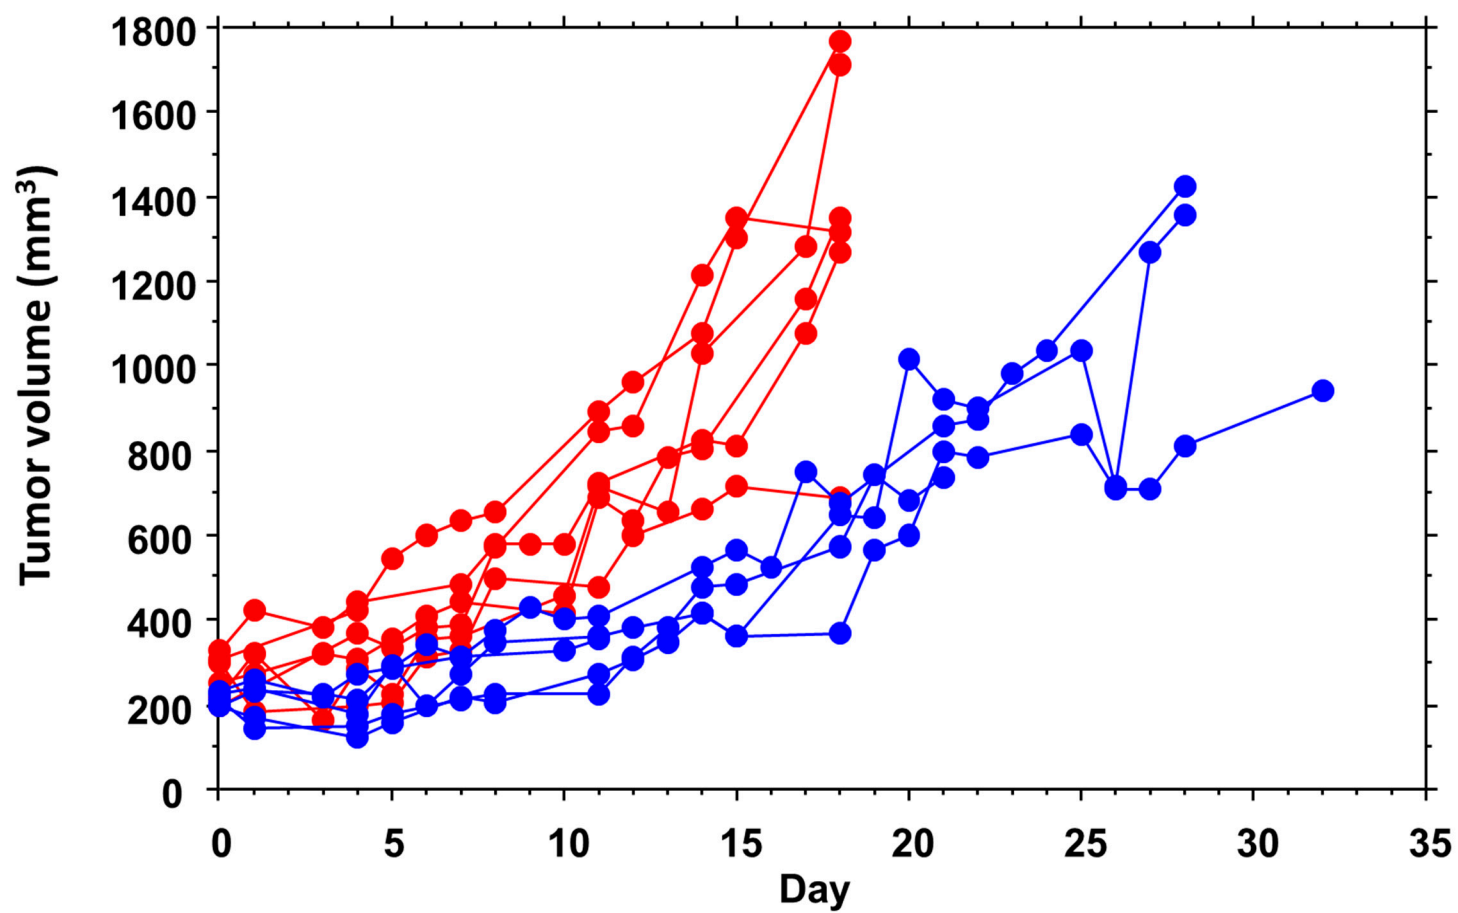

**Figure S7:** Growth curves for individual orthotopic MDA-MB-231-luc tumors receiving saline (red, controls; n=6) or OXi6197 (blue, 20 mg/kg twice weekly ; n=5). Individual tumors in each group showed highly consistent growth.

**Control (saline)**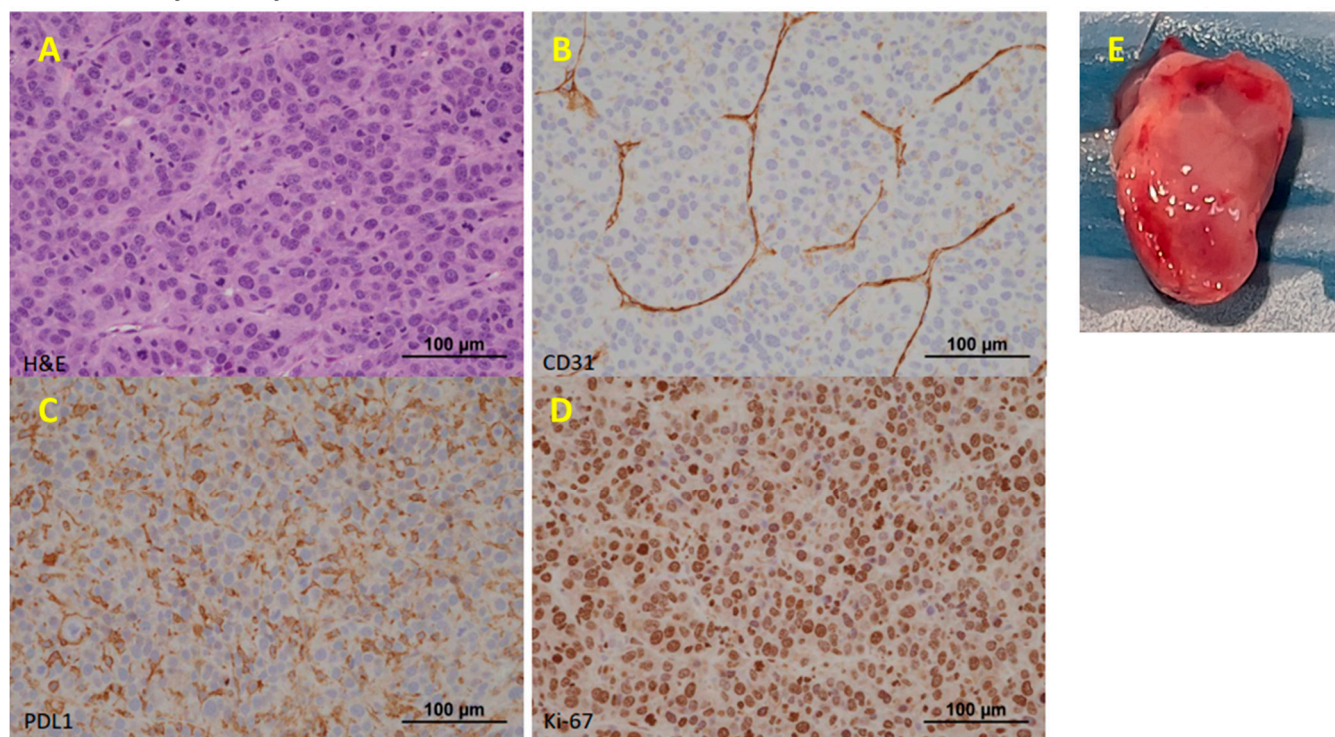

**Figure S8:** Representative histology images of control RENCA-luc tumor from selected areas of whole mount tumor. A) H&E showing viable pleomorphic tumor cells, B) CD31 IHC highlighting the thin vascular network, C) Tumor cells with prominent membranous and cytoplasmic PD-L1 expression, and D) Ki67 showing high proliferative activity, and E) Photograph of tissue slice at time of sacrifice and resection.

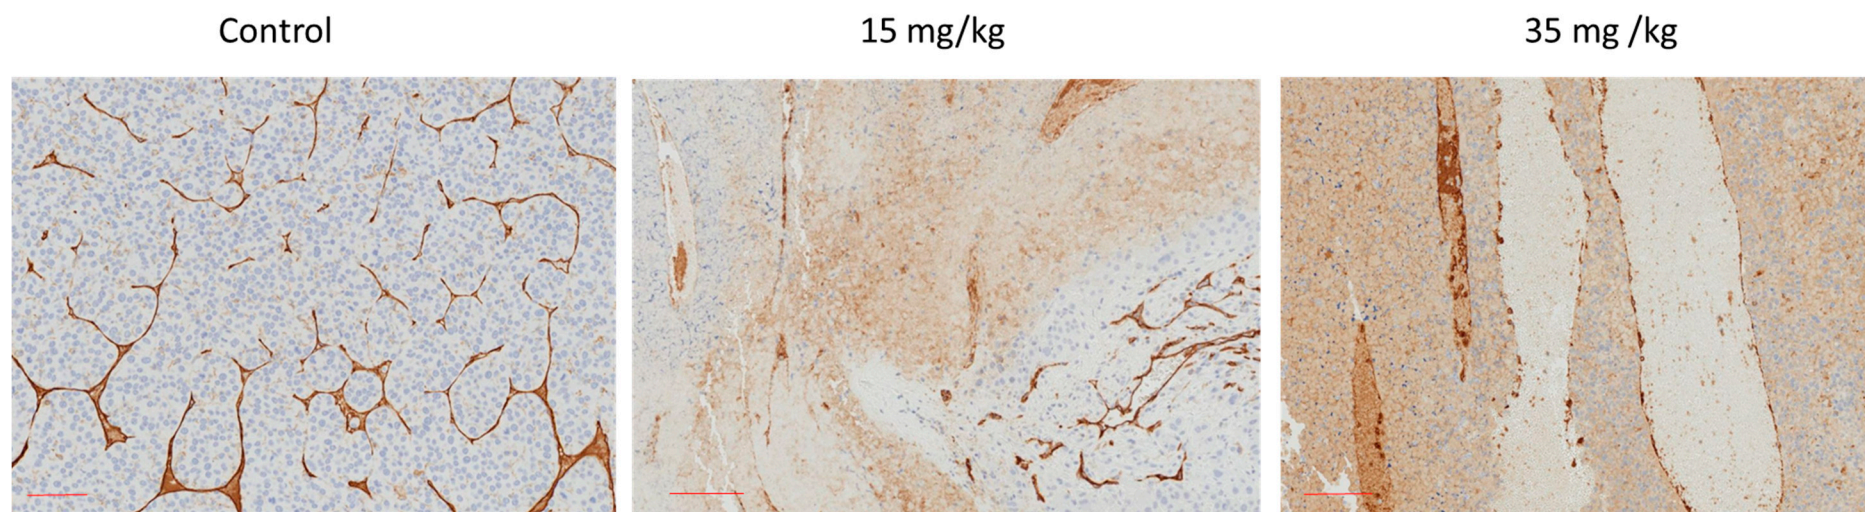

**Figure S9:** Representative histology images of CD31 IHC from RENCA-luc tumors A) highlighting the thin vascular network of control untreated tumors, B) Swollen vessels and pockets of remaining vasculature after 15 mg/kg OXi6197, and C) Massively swollen vessels after 35 mg/kg OXi6197. Tissues resected 24 h after administration of OXi6197, as for Figure 8. Red bar 100 μm.

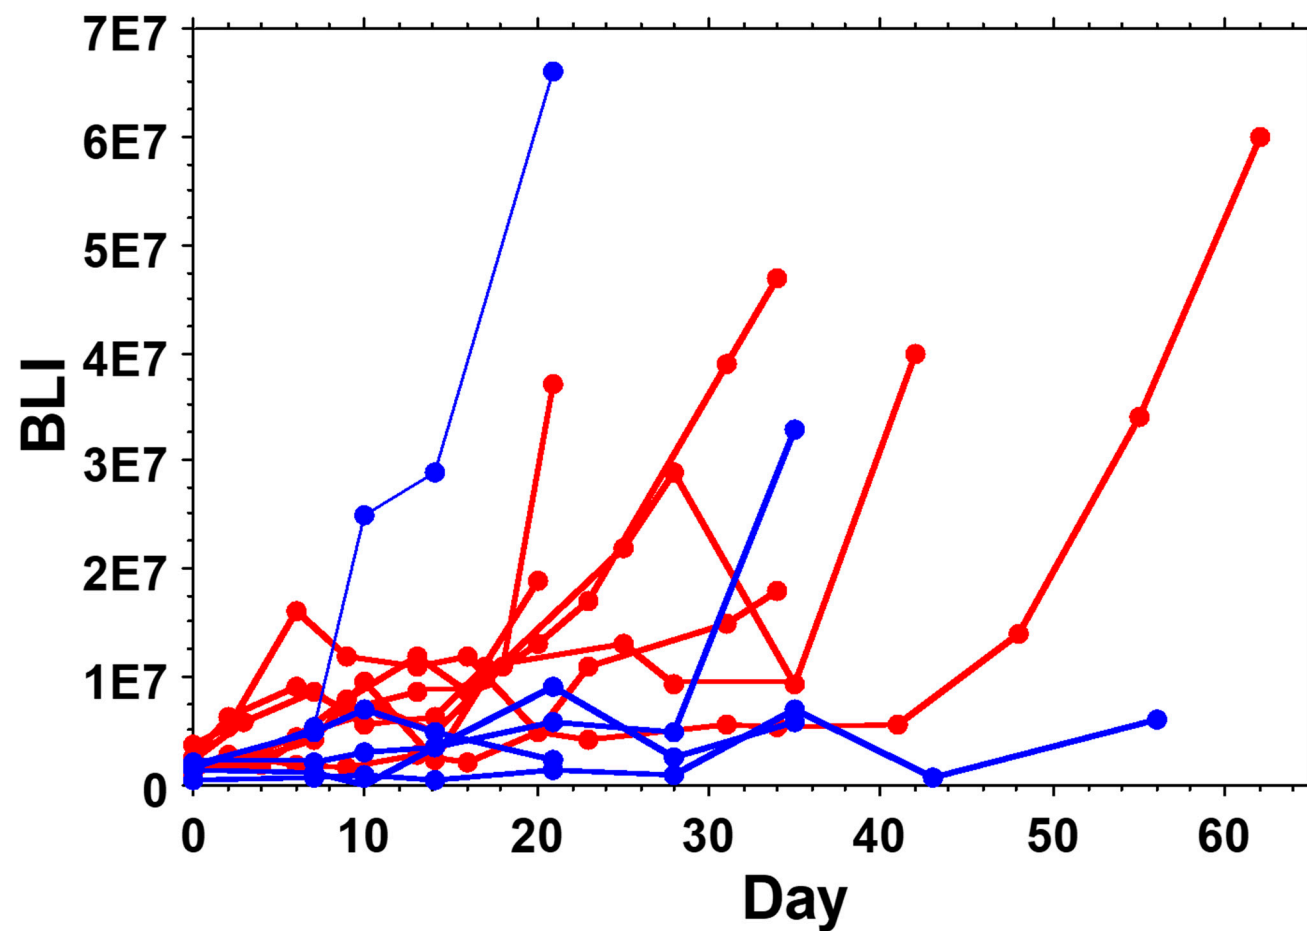

**Figure S10:** Growth curves based on BLI signal for individual orthotopic RENCA-luc tumors receiving saline (red, controls, n=7) or OXi6197 (blue, 35 mg/kg twice weekly, n=5). Treated mice generally showed slower growth and the obvious outlier is marked with asterisk.

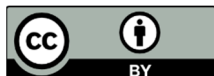

Supplement: s1 [file s1]
